# Supplementary material for: Effect Of Stretching and Flexibility Exercises On Ankle Functional Abilities Post Ankle Fracture
Source: Research Square preprint supplement (doi:10.21203/rs.3.rs-7255521/v1), 2025-08-13
Supplement: Supplementary file 1 [file 9757777c72e796538bc33db2.docx]

**Stretching Exercises**

| **Stretching Exercises** | **Main muscles worked** | **Steps** |
| --- | --- | --- |
| **1. Heel Cord Stretch** | Gastrocnemius-soleus complex | 1. Stand facing a wall with your unaffected leg forward with a slight bend at the knee. Your affected leg is straight and behind you, with the heel flat and the toes pointed in slightly. 2. Keep both heels flat on the floor and press your hips forward toward the wall. 3. Hold this stretch for 30 seconds and then relax for 30 seconds. Repeat. |
| **2. Heel Cord Stretch with Bent Knee** | Soleus | 1. Stand facing a wall with your unaffected leg forward with a slight bend at the knee. Your affected leg is behind you, with the knee bent and the toes pointed in slightly. 2. Keep both heels flat on the floor and press your hips forward toward the wall. 3. Hold the stretch for 30 seconds and then relax for 30 seconds. Repeat. |
| **3. Golf Ball Roll**  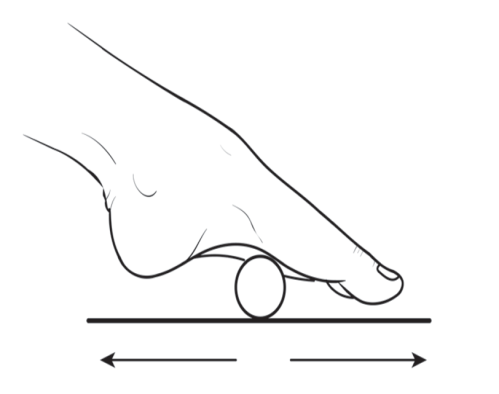 | Plantar fascia ligament | 1. Sit on a stable chair with both feet planted on the floor. 2. Roll a golf ball under the arch of your affected foot for 2 minutes. |
| **4. Towel Stretch**  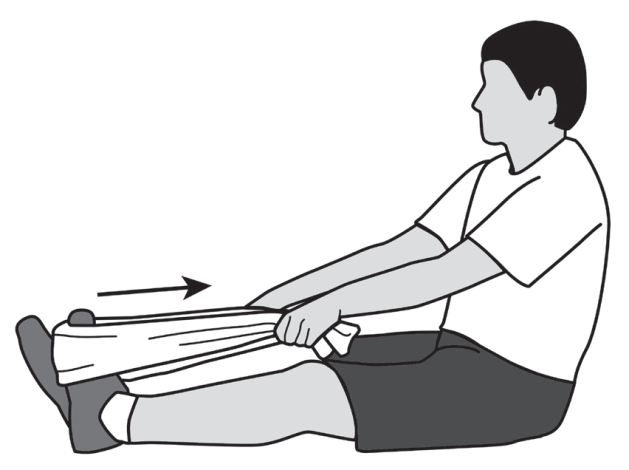 | Gastrocnemius-soleus complex | 1. Sit on the floor with both legs out in front of you.Loop a towel around the ball of your affected foot and grasp the ends of the towel in your hands. 2. Keep your affected leg straight and pull the towel toward you. 3. Hold for 30 seconds and then relax for 30 seconds. Repeat 3 times |

**Flexibility exercises**

| **Ankle Range of Motion and flexibility exercises** | **Main muscles worked** | **Steps** |
| --- | --- | --- |
| **1. Ankle alphabet** | Dorsiflexors, plantar flexors, invertors, evertors. | 1. Sit down so that your feet do not touch the floor. 2. Use your foot to write each letter of the alphabet in the air. Lead with your big toe. |
| **2. Ankle pumps and circles**  **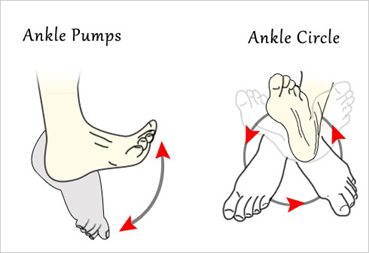** | Dorsiflexors, plantar flexors, invertors, evertors. | 1. The patient was instructed to bend ankle of the affected leg up, pulling toes toward him. 2. Bend his ankle down, pointing his toes away from him. In addition, rotate the affected ankle clock wise. |
| **3. Toe raise, point, and curl**  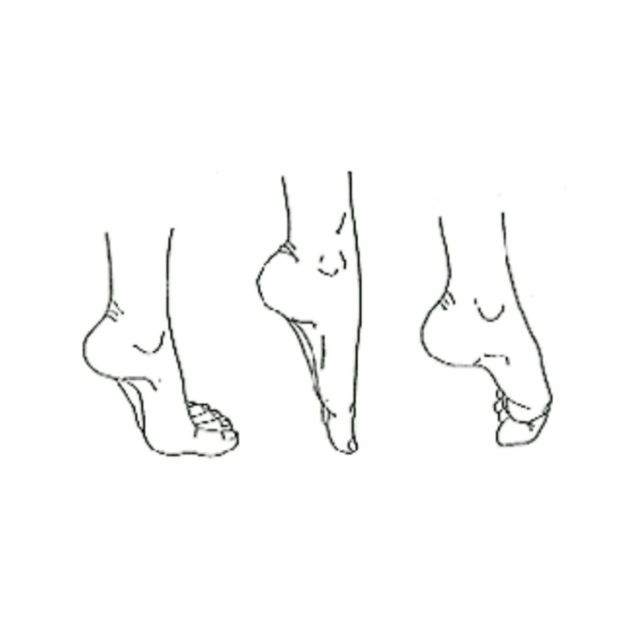 |  | **This exercise has three stages:**   1. Sit up straight in a chair, with the feet flat on the floor. 2. Keeping the toes on the floor, raise the heels. Stop when only the balls of the feet remain on the ground. 3. Hold this position for 5 seconds before lowering the heels. 4. For the second stage, raise the heel and point the toes so that only the tips of the big and second toes are touching the floor. 5. Hold for 5 seconds before lowering. 6. For the third stage, raise the heel and curl the toes inward, so that only the tips of the toes are touching the floor. Hold this position for 5 seconds. 7. Build flexibility and mobility by repeating each stage 10 times. |
